# Supplementary material for: Glycolysis on F-18 FDG PET/CT Is Superior to Amino Acid Metabolism on C-11 Methionine PET/CT in Identifying Advanced Renal Cell Carcinoma at Staging
Source: MDPI journal article supplement (doi:10.3390/cancers13102381), 2021-05-14
Supplement: s1 [file s1]

# Supplementary Material: Glycolysis on F-18 FDG PET/CT is Superior to Amino Acid Metabolism on C-11 Methionine PET/CT in Identifying Advanced Renal Cell Carcinoma at Staging

Suk Hyun Lee <sup>1,2,†</sup>, Jee Soo Park <sup>3,†</sup>, Hyunjeong Kim <sup>4</sup>, Dongwoo Kim <sup>1</sup>, Seung Hwan Lee <sup>3</sup>, Won Sik Ham <sup>3</sup>, Woong Kyu Han <sup>3</sup>, Young Deuk Choi <sup>3,\*</sup> and Mijin Yun <sup>1,\*</sup>

Table S1. Characteristics of individual patients.

| No. | Sex | Age | Tumor size | Histology   | SUVmax FDG | MTV FDG | SUVmax MET | MTV MET | Fuhrman grade | AJCC stage | pT | pN | pM |
|-----|-----|-----|------------|-------------|------------|---------|------------|---------|---------------|------------|----|----|----|
| 1   | M   | 86  | 7.2        | Clear cell  | 6.43       | 28.96   | 7.64       | 4.08    | 3             | 3          | 3a | 0  | 0  |
| 2   | F   | 63  | 5.5        | Clear cell  | 3.80       | 2.28    | 4.64       | 0.15    | 3             | 1          | 1b | 0  | 0  |
| 3   | M   | 62  | 5.5        | Clear cell  | 9.94       | 13.00   | 5.46       | 4.40    | 2             | 4          | 1b | 0  | 1  |
| 4   | M   | 63  | 10.6       | Papillary   | 6.01       | 295.46  | 4.90       | 148.60  | 3             | 3          | 3a | 0  | 0  |
| 5   | F   | 69  | 8.0        | Clear cell  | 8.83       | 185.21  | 4.78       | 0.63    | 4             | 3          | 3a | 1  | 0  |
| 6   | M   | 59  | 8.5        | Clear cell  | 17.73      | 134.92  | 6.18       | 1.54    | 3             | 3          | 3b | 0  | 0  |
| 7   | F   | 76  | 8.2        | Clear cell  | 4.60       | 2.25    | 6.10       | 9.76    | 2             | 2          | 2a | 0  | 0  |
| 8   | F   | 79  | 9.0        | Clear cell  | 7.88       | 67.55   | 10.75      | 16.28   | 3             | 4          | 3a | 0  | 1  |
| 9   | F   | 60  | 7.5        | Clear cell  | 6.85       | 99.16   | 6.66       | 9.74    | 4             | 3          | 3a | 0  | 0  |
| 10  | F   | 78  | 7.3        | Chromophobe | 2.99       | 0.81    | 6.94       | 70.49   | 2             | 2          | 2a | 0  | 0  |
| 11  | F   | 76  | 7.0        | Clear cell  | 3.32       | 0.34    | 4.99       | 21.37   | 2             | 2          | 2a | 0  | 0  |
| 12  | F   | 71  | 5.0        | Clear cell  | 18.84      | 76.97   | 10.67      | 40.15   | 3             | 4          | 4  | 0  | 1  |
| 13  | F   | 61  | 6.8        | Chromophobe | 2.98       | 1.44    | 4.26       | 0.18    | 2             | 1          | 1b | 0  | 0  |
| 14  | M   | 56  | 9.0        | Clear cell  | 8.95       | 112.82  | 3.93       | 40.19   | 3             | 4          | 3a | 0  | 1  |
| 15  | M   | 59  | 11.0       | Clear cell  | 9.21       | 74.40   | 5.25       | 28.87   | 3             | 3          | 3c | 0  | 0  |
| 16  | M   | 67  | 4.0        | Clear cell  | 7.35       | 21.21   | 7.95       | 5.21    | 4             | 1          | 1a | 0  | 0  |
| 17  | M   | 35  | 8.5        | Clear cell  | 3.54       | 0.15    | 1.86       | 0.00    | 2             | 2          | 2a | 0  | 0  |
| 18  | M   | 48  | 5.4        | Papillary   | 4.06       | 8.35    | 2.85       | 0.00    | 2             | 1          | 1b | 0  | 0  |

|    |   |    |      |              |       |        |       |        |   |   |    |   |   |
|----|---|----|------|--------------|-------|--------|-------|--------|---|---|----|---|---|
| 19 | M | 64 | 9.0  | Clear cell   | 11.59 | 225.28 | 5.31  | 26.00  | 3 | 3 | 3a | 0 | 0 |
| 20 | F | 52 | 7.0  | Clear cell   | 8.47  | 31.44  | 4.83  | 3.95   | 3 | 2 | 2a | 0 | 0 |
| 21 | F | 34 | 9.0  | Chromo-phobe | 2.23  | 5.52   | 2.81  | 3.57   | 3 | 2 | 2a | 0 | 0 |
| 22 | M | 40 | 8.3  | Clear cell   | 4.50  | 0.02   | 4.95  | 0.00   | 3 | 2 | 2a | 0 | 0 |
| 23 | M | 56 | 7.7  | Clear cell   | 2.16  | 0.00   | 1.49  | 1.38   | 2 | 2 | 2a | 0 | 0 |
| 24 | M | 60 | 6.7  | Clear cell   | 10.74 | 24.42  | 6.46  | 5.26   | 3 | 3 | 3a | 0 | 0 |
| 25 | M | 74 | 8.8  | Clear cell   | 4.55  | 79.91  | 7.61  | 0.79   | 3 | 3 | 3a | 0 | 0 |
| 26 | F | 48 | 9.5  | Clear cell   | 4.51  | 15.41  | 6.53  | 4.18   | 3 | 2 | 2a | 0 | 0 |
| 27 | F | 66 | 13.0 | Clear cell   | 7.64  | 515.38 | 9.93  | 424.01 | 3 | 4 | 4  | 1 | 1 |
| 28 | F | 58 | 13.0 | Clear cell   | 5.96  | 125.38 | 8.99  | 10.48  | 2 | 4 | 2b | 0 | 1 |
| 29 | F | 56 | 11.0 | Clear cell   | 25.27 | 336.03 | 11.81 | 44.84  | 4 | 4 | 3a | 1 | 1 |
| 30 | F | 68 | 10.1 | Clear cell   | 3.28  | 0.00   | 1.30  | 0.00   | 2 | 4 | 2b | 0 | 1 |
| 31 | M | 62 | 3.5  | Chromo-phobe | 3.18  | 46.91  | 6.82  | 65.99  | 3 | 3 | 3a | 0 | 0 |
| 32 | F | 46 | 6.5  | Clear cell   | 21.52 | 163.28 | 10.41 | 137.12 | 3 | 3 | 3b | 0 | 0 |
| 33 | M | 39 | 7.7  | Clear cell   | 2.88  | 0.20   | 2.30  | 0.00   | 2 | 2 | 2a | 0 | 0 |
| 34 | M | 61 | 4.1  | Clear cell   | 2.66  | 0.00   | 4.47  | 0.00   | 3 | 1 | 1b | 0 | 0 |
| 35 | M | 55 | 9.0  | Clear cell   | 7.39  | 222.17 | 9.24  | 25.78  | 3 | 4 | 3a | 0 | 1 |
| 36 | F | 37 | 9.0  | Clear cell   | 18.73 | 233.53 | 9.30  | 90.40  | 4 | 3 | 3c | 0 | 0 |
| 37 | F | 57 | 7.0  | Clear cell   | 3.07  | 2.89   | 6.58  | 1.24   | 2 | 3 | 3a | 0 | 0 |
| 38 | M | 73 | 15.0 | Clear cell   | 4.48  | 44.86  | 3.42  | 5.02   | 3 | 3 | 3a | 0 | 0 |
| 39 | M | 48 | 10.5 | Clear cell   | 7.19  | 202.94 | 4.72  | 0.07   | 4 | 3 | 3a | 0 | 0 |
| 40 | M | 63 | 8.2  | Clear cell   | 11.37 | 119.02 | 6.84  | 11.03  | 3 | 3 | 3a | 0 | 0 |
